# Distinct Pharmacologic Properties of Neuromuscular Blocking Agents on Human Neuronal Nicotinic Acetylcholine Receptors

## A Possible Explanation for the Train-of-four Fade

Malin Jonsson, M.D., Ph.D.,\* David Gurley, M.S.,† Michael Dabrowski, Ph.D.,‡ Olof Larsson, Ph.D.,§ Edwin C. Johnson, Ph.D.,# Lars I. Eriksson, M.D., Ph.D.||

**Background:** Nondepolarizing neuromuscular blocking agents (NMBAs) are extensively used in the practice of anesthesia and intensive care medicine. Their primary site of action is at the postsynaptic nicotinic acetylcholine receptor (nAChR) in the neuromuscular junction, but their action on neuronal nAChRs have not been fully evaluated. Furthermore, observed adverse effects of nondepolarizing NMBAs might originate from an interaction with neuronal nAChRs. The aim of this study was to examine the effect of clinically used nondepolarizing NMBAs on muscle and neuronal nAChR subtypes.

**Methods:** *Xenopus laevis* oocytes were injected with messenger RNA encoding for the subunits included in the human  $\alpha_1\beta_1\epsilon\delta$ ,  $\alpha_3\beta_2$ ,  $\alpha_3\beta_4$ ,  $\alpha_4\beta_2$ , and  $\alpha_7$  nAChR subtypes. The interactions between each of these nAChR subtypes and atracurium, cisatracurium, d-tubocurarine, mivacurium, pancuronium, rocuronium, and vecuronium were studied using an eight-channel two-electrode voltage clamp setup. Responses were measured as peak current and net charge.

**Results:** All nondepolarizing NMBAs inhibited both muscle and neuronal nAChRs. The neuronal nAChRs were reversibly and concentration-dependently inhibited in the low micromolar range. The mechanism (*i.e.*, competitive *vs.* noncompetitive) of the block at the neuronal nAChRs was dependent both on subtype and the NMBA tested. The authors did not observe activation of the nAChR subtypes by any of the NMBAs tested.

**Conclusions:** The authors conclude that nondepolarizing NMBAs concentration-dependently inhibit human neuronal nAChRs. The inhibition of the presynaptic  $\alpha_3\beta_2$  nAChR subtype expressed at the motor nerve ending provides a possible molecular explanation for the tetanic and train-of-four fade seen during a nondepolarizing neuromuscular block.

NONDEPOLARIZING neuromuscular blocking agents (NMBAs) are extensively used in the practice of anesthesia and intensive care medicine to facilitate tracheal

intubation and mechanical ventilation and to improve surgical conditions.

Although it is well established that nondepolarizing NMBAs block the postsynaptic  $\alpha_1\beta_1\epsilon\delta$  nicotinic acetylcholine receptor (nAChR) subtype at the muscle endplate, the effect on the presynaptic motor nerve ending has not been clarified (for a review, see Vizi and Lendvai<sup>1,2</sup> and Bowman *et al.*<sup>3</sup>). It is believed that the mechanism behind tetanic and train-of-four (TOF) fade during neuromuscular block by a nondepolarizing NMBA arise from an interaction with presynaptic cholinergic autoreceptors at the motor nerve ending.<sup>1,3</sup> However, the affinity of nondepolarizing NMBAs to such presynaptic autoreceptors has not been investigated at the molecular level. Further, it has recently been shown that an inhibition of the presynaptic  $\alpha_3\beta_2$  nAChR subtype at the motor nerve end<sup>4</sup> induces tetanic fade.<sup>5</sup> Based on this, it seems likely that the tetanic fade phenomenon seen during nondepolarizing neuromuscular block is due to an inhibition of the  $\alpha_3\beta_2$  nAChR subtype.

The  $\alpha_1\beta_1\epsilon\delta$  and the  $\alpha_3\beta_2$  nAChRs are members of the same neurotransmitter-gated ion channel superfamily. They are composed of five transmembrane subunits with a central cation pore, and the stoichiometry and identity of subunits determines each receptor's unique properties.<sup>6</sup> To date, 17 nicotinic subunits have been cloned in vertebrates: the muscle  $\alpha_1$ ,  $\beta_1$ ,  $\delta$ ,  $\gamma$ , and  $\epsilon$  subunits and the neuronal  $\alpha_{2-10}$  and  $\beta_{2-4}$  subunits.<sup>7</sup> Although there are many potential combinations of neuronal nAChRs, only a few have as yet been found to be of biologic importance.<sup>8,9</sup> The neuronal nAChRs are found both presynaptically and postsynaptically in neurons of the central ( $\alpha_4\beta_2$ ,  $\alpha_3\beta_2$ ,  $\alpha_7$ )<sup>9,10</sup> and peripheral nervous system ( $\alpha_3\beta_4$ ,  $\alpha_3\beta_2$ ,  $\alpha_7$ )<sup>9,11,12</sup> as well as in extraneuronal tissues and cells, such as keratinocytes, muscle, lymphocytes, macrophages, carotid bodies, and neurosecretory cells.<sup>6,7,13</sup>

Interactions between NMBAs and neuronal nAChRs may cause serious cardiovascular and respiratory side effects. It has been shown that nondepolarizing NMBAs reduce hypoxic ventilatory response in partially paralyzed humans,<sup>14,15</sup> and the mechanism behind this depression might be interference with nicotinic chemotransduction of the carotid bodies.<sup>16,17</sup> At the molecular level, d-tubocurarine, pancuronium, atracurium, and its degradation product laudanosine have been shown to

\* Resident, || Professor, Department of Anesthesiology and Intensive Care Medicine, Karolinska University Hospital and Karolinska Institutet. † Principal Scientist, Director, Target Biology, AstraZeneca Pharmaceuticals, Wilmington, Delaware. ‡ Senior Research Scientist, § Associate Professor, Molecular Pharmacology, AstraZeneca R&D, Södertälje, Sweden.

Received from the Department of Anesthesiology and Intensive Care Medicine, Karolinska University Hospital, Stockholm, and Karolinska Institutet, Stockholm, Sweden. Submitted for publication February 15, 2006. Accepted for publication May 5, 2006. Supported by grants from the Swedish Research Council (project No. 10401), Olof Norlander Travel Grant, the Stockholm County Council, the Swedish Society of Medicine, Karolinska Institutet Travel Grants and Funds, and Hirsch Fellowship, all Stockholm, Sweden. GlaxoSmithKline, Barnard Castle Durham, United Kingdom, provided atracurium and cisatracurium; NV Organon, BH Oss, The Netherlands, provided pancuronium, rocuronium, and vecuronium; and AstraZeneca Pharmaceuticals, Wilmington, Delaware, provided messenger RNA for the nicotinic acetylcholine receptor subunits.

Address correspondence to Dr. Jonsson: Department of Anesthesiology and Intensive Care Medicine, and Karolinska Institutet, Karolinska University Hospital, Stockholm, SE-171 76 Stockholm, Sweden. malin.jonsson@karolinska.se. Individual article reprints may be purchased through the Journal Web site, www.anesthesiology.org.

block neuronal nAChR subtypes expressed in *Xenopus* oocytes.<sup>18–22</sup> Interestingly, some reports indicate that NMBAs can act as partial agonists at  $\alpha_1\beta_1\gamma\delta$ ,  $\alpha_3\beta_4$ , and  $\alpha_4\beta_2$  nAChR subtypes<sup>21,23</sup>; however, other studies could not demonstrate any agonism by NMBAs.<sup>20,24</sup>

The  $\alpha_7$  nAChR subtype plays a key role in the cholinergic reflex involved in inflammatory conditions such as sepsis,<sup>25,26</sup> and it can be speculated whether NMBAs used in intensive care settings might interact with the inflammatory response to sepsis. Furthermore, although highly charged, NMBAs can under certain conditions cross the blood–brain barrier,<sup>27–29</sup> thus having the potential to interact with central cholinergic receptors and the synaptic transmission<sup>30</sup> and cause seizures.<sup>31,32</sup>

Because most nondepolarizing NMBAs were developed before cloning and isolation of their target proteins, the precise modes of action have not been examined in detail. A better understanding of the molecular mechanisms of action of clinically used nondepolarizing NMBAs on human neuronal nAChR subtypes is needed. In addition, for future drug design, it is essential to define potential interactions with human neuronal nAChRs.

The aim of this study was therefore to investigate the potency and functional affinity of clinically used nondepolarizing NMBAs on acetylcholine-induced responses on human muscle and neuronal nAChRs heterologously expressed in *Xenopus* oocytes. In addition, potential activation of nAChRs by nondepolarizing NMBAs was also investigated.

## Materials and Methods

### Clones

The human nAChR subunits  $\alpha_1$ ,  $\alpha_{3-4}$ ,  $\alpha_7$ ,  $\beta_1$ ,  $\beta_2$ ,  $\beta_4$ ,  $\delta$ , and  $\epsilon$  were cloned from a human complementary DNA (cDNA) library. GenBank (Bethesda, MD) access numbers for the cDNA nucleotide sequences are as follows: NM 000079 ( $\alpha_1$ ), HSU62432 ( $\alpha_3$ ), L35901 ( $\alpha_4$ ), Y08420 ( $\alpha_7$ ), NM 000747 ( $\beta_1$ ), Y08415 ( $\beta_2$ ), NM 000750 ( $\beta_4$ ), NM 000751 ( $\delta$ ), and NM 000080 ( $\epsilon$ ). The cDNAs were subcloned into different expression vectors, pKGem (AstraZeneca, Wilmington, DE) ( $\alpha_1$ ,  $\alpha_3$ ,  $\beta_1$ ,  $\beta_2$ ,  $\delta$  and  $\epsilon$ ), pBluescript II SK (–) (Stratagene, La Jolla, CA) ( $\alpha_7$ ), and pBSTA (University of California, Irvine, CA) ( $\alpha_4$  and  $\beta_4$ ). Messenger RNA (mRNA) was transcribed *in vitro* using the mMessage mMachine<sup>®</sup> T7 kit (Ambion, Austin, TX) and analyzed using a bioanalyzer (Agilent Technologies, Palo Alto, CA).

### *Xenopus* Oocyte Injection

The study was approved by the local animal ethics committee at Karolinska Institutet, Stockholm, Sweden. Preparation and injection of oocytes and the electrophysiologic recordings were conducted as previously described.<sup>33</sup> Briefly, *Xenopus laevis* oocytes were iso-

lated by partial ovariectomy from frogs anesthetized with 0.2% Tricaine (Sigma, St. Louis, MO). The ovaries were mechanically dissected to smaller lumps and digested in OR-2 buffer (82.5 mM NaCl, 2 mM KCl, 1 mM MgCl<sub>2</sub>, 5 mM HEPES, pH adjusted to 7.5 with NaOH) containing 1.5 mg/ml collagenase (type 1A; Sigma) for 90 min to remove the follicular epithelia from the oocytes. After 1–24 h, the oocytes were injected with 0.2–18 ng mRNA in a total volume of 30–40 nl/oocyte. Multiple subunit combinations were injected at a 1:1 ratio ( $\alpha_1\beta_1\epsilon\delta$  or  $\alpha_x\beta_y$ ), except for  $\alpha_4\beta_2$ , where the injection ratio was 1:9. The oocytes were maintained in Leibovitz L-15 medium (Sigma) diluted 1:1 with Millipore filtered double distilled H<sub>2</sub>O (Billerica, MA) and 80  $\mu$ g/ml gentamicin, 100 U/ml penicillin, and 100  $\mu$ g/ml streptomycin added. Oocytes were incubated at 18°–19°C for 2–7 days after injection before being studied.

### Electrophysiologic Recordings

All recordings were performed at room temperature (20°–22°C). During recording, the oocytes were continuously perfused with ND-96 (96.0 mM NaCl, 2.0 mM KCl, 1.8 mM CaCl<sub>2</sub>, 1.0 mM MgCl<sub>2</sub>, 5.0 mM HEPES, pH 7.4 adjusted with NaOH). Oocyte recordings were performed using an integrated system that provides automated impalement of up to eight oocytes, studied in parallel with two-electrode voltage clamp, and current measurements were automatically coordinated with fluid delivery throughout the experiment (OpusXpress 6000A; Molecular Devices, Union City, CA). Electrodes were made from 1.5-mm borosilicate tubes (World Precision Instruments Inc., Sarasota, FL) and filled with 3 M KCl (0.5–2.5 M $\Omega$  resistance). The oocytes were voltage clamped at –60 mV, because it has previously been shown that inhibition of nAChRs by nondepolarizing NMBAs is voltage independent at holding voltages from –100 to –40 mV.<sup>20,23</sup>

### Protocol

Oocytes were continuously perfused with ND-96 at a rate of 2 ml/min in a 150- $\mu$ l chamber. Drugs were delivered from a 96-well plate using disposable tips and administered at a rate of 2 ml/min for the first 2 s, and thereafter at 1 ml/min. Concentration–response curves for acetylcholine were constructed, before and after the addition of 10  $\mu$ M antagonist in each oocyte, for the neuronal nAChRs. To determine whether nondepolarizing NMBAs activate and furthermore inhibit acetylcholine-induced currents, nondepolarizing NMBAs were applied for 55 s before a 20-s coapplication of both antagonist and acetylcholine. Two different concentrations of acetylcholine were applied on each neuronal receptor subtype. The concentrations 1 and 10  $\mu$ M (for  $\alpha_4\beta_2$ ), 50 and 300  $\mu$ M (for  $\alpha_3\beta_2$  and  $\alpha_3\beta_4$ ), and 30 and 100  $\mu$ M (for  $\alpha_7$ ) were chosen to represent concentrations below and above the EC<sub>50</sub> for each receptor subtype. The muscle nAChR ( $\alpha_1\beta_1\epsilon\delta$ ) was used as a reference,

and therefore only one acetylcholine concentration (10  $\mu\text{M}$ ) was studied. Between each drug application, there was a 6-min washout period to allow clearance of the drugs and to avoid desensitization of the channels. Before and after each concentration-response experiment, three control responses were recorded at  $\text{EC}_{50}$  acetylcholine concentration to exclude desensitization. Experiments were rejected if the postcontrol response was less than 80% of the precontrol response. To adjust for the level of channel expression, the responses in acetylcholine concentration-response experiments were normalized to the peak response in each individual oocyte. For inhibition experiments, responses in each oocyte were normalized to the mean of the second and third acetylcholine precontrols.

### Drugs

Acetylcholine and d-tubocurarine were purchased from Sigma. Atracurium and cisatracurium were provided by GlaxoSmithKline (Barnard Castle Durham, United Kingdom). Mivacurium (Mivacron<sup>®</sup>) was purchased from GlaxoSmithKline (Möln dal, Sweden). Org NC 97 (pancuronium), Org NC 45 (vecuronium), and rocuronium were provided by Organon (BH Oss, The Netherlands). Chemicals used in buffers were purchased from Sigma unless otherwise stated. Stock solution of 1mM acetylcholine in ND-96 was prepared and frozen. Nondepolarizing NMBAs were prepared fresh each day and stored at +4°C. All drugs were then diluted in ND-96 immediately before use.

### Data Analysis and Statistics

Off-line analyses were made using Clampfit 9.2 (Molecular Devices). Changes in currents were studied both as peak and net charge responses (area under the curve); however, for the  $\alpha_7$  subtype, only net charge analysis was used, as previously described.<sup>33-35</sup> The baseline current immediately before drug application was subtracted from the response, and the analysis region for peak and net charge analysis was 20 s, *i.e.*, during the time of agonist application. Concentration-response relations for acetylcholine were fitted by nonlinear regression (Prism 4.0; GraphPad, San Diego, CA) to the four-parameter logistic equation

$$Y = \text{Bottom} + \frac{(\text{Top} - \text{Bottom})}{\left[1 + \left(\frac{x}{\text{EC}_{50}}\right)^{n_{\text{Hill}}}\right]}$$

where Y is the normalized response, x is the logarithm of concentration, and  $\text{EC}_{50}$  is the logarithm of the concentration of agonist eliciting half-maximal response. When NMBA-induced inhibition was studied, the same equation was used, and  $\text{EC}_{50}$  was replaced by  $\text{IC}_{50}$ , which is the concentration of antagonist eliciting half-maximal inhibition, Bottom = 0, Top = 1. Unless otherwise stated, data are given as mean  $\pm$  SEM or 95% confidence

interval (CI). Differences between fitted curves were analyzed using an F test, followed by a *t* test (Prism 4.0). A *P* value of less than 0.05 was considered significant.

## Results

### Acetylcholine Concentration-Response Relations for Muscular and Neuronal nAChRs

Acetylcholine produced a concentration-dependent inward current in voltage clamped oocytes injected with mRNA encoding muscle- and neuronal-type nAChRs, whereas uninjected oocytes did not respond to acetylcholine (data not shown). The responses to acetylcholine in terms of kinetics and  $\text{EC}_{50}$  values at the nAChR subtypes were consistent with previous reports<sup>18,33,36</sup> (fig. 1 and table 1), thus confirming the receptor expression model. However, kinetics can also be determined using net charge analysis. Unfortunately, there is a lack of published data for comparison of net charge in human nAChRs, except for the  $\alpha_7$  nAChR subtype.<sup>35</sup> As shown in figure 1, at  $\alpha_3\beta_4$  and  $\alpha_4\beta_2$  nAChR concentration-response relations based on net charge analysis correlate well with peak currents, with almost identical  $\text{EC}_{50}$  and Hill coefficients (appendix 1). However, the  $\alpha_7$  subtype nAChR displays unique properties, with very fast desensitization kinetics (fig. 1A), which gives a different concentration-response relation depending on whether peak response or net charge was measured (appendix 1). At the  $\alpha_3\beta_2$  subtype, which has an initial rapid desensitization, there was a small difference between the  $\text{EC}_{50}$  values.

### Inhibition of Muscle nAChRs by Nondepolarizing NMBAs

Because the adult muscle ( $\alpha_1\beta_1\epsilon\delta$ ) nAChR is the clinical target for nondepolarizing NMBAs, this receptor subtype was used as reference in the oocyte setup. Atracurium, cisatracurium, d-tubocurarine, mivacurium, pancuronium, rocuronium, and vecuronium all concentration-dependently inhibited 10  $\mu\text{M}$  acetylcholine-induced currents in oocytes expressing the human  $\alpha_1\beta_1\epsilon\delta$  nAChR (fig. 2 and table 2). The  $\text{IC}_{50}$  values were in the nanomolar range and were comparable with a similar study investigating nondepolarizing NMBAs, using mouse cRNA.<sup>37</sup>

### Neuronal nAChRs Are Inhibited by Nondepolarizing NMBAs

Atracurium, cisatracurium, d-tubocurarine, mivacurium, pancuronium, rocuronium, and vecuronium reversibly and concentration-dependently inhibited all of the neuronal nAChR subtypes tested (*i.e.*,  $\alpha_3\beta_2$ ,  $\alpha_3\beta_4$ ,  $\alpha_4\beta_2$ , and  $\alpha_7$ ) with  $\text{IC}_{50}$  values in the micromolar range (figs. 3 and 4, table 2, and appendix 2).

All the nondepolarizing NMBAs except mivacurium



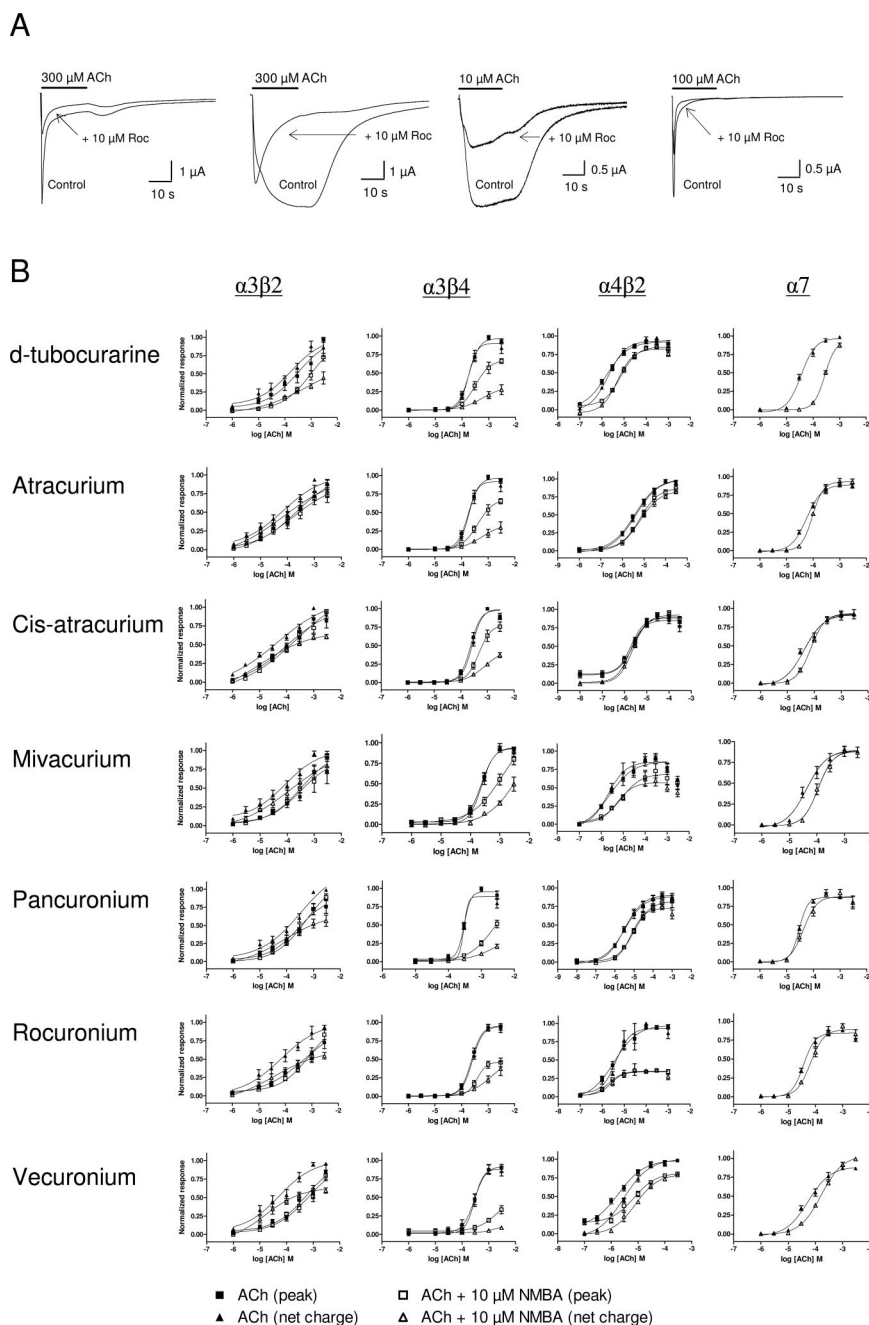

**Fig. 1.** Effect of 10  $\mu$ M nondepolarizing neuromuscular blocking agents (NMBAs) on acetylcholine (ACh)-mediated responses in voltage clamped ( $-60$  mV) *Xenopus* oocytes expressing human neuronal nAChRs. (A) Representative traces showing the inhibitory effect of 10  $\mu$ M rocuronium (Roc) on the  $\alpha_3\beta_2$ ,  $\alpha_3\beta_4$ ,  $\alpha_4\beta_2$ , and  $\alpha_7$  receptor subtypes (displayed in the same order). (B) Responses in each oocyte were normalized to the maximal acetylcholine peak current and maximal net charge ( $\alpha_7$ ) in each oocyte, giving the concentration-response curves. Each symbol represents mean  $\pm$  SEM of 3–14 oocytes. When no error bars are seen, they are smaller than the symbols.

showed similar affinity at the  $\alpha_3\beta_2$  nAChR subtype, with  $IC_{50}$  values of 3–20  $\mu$ M after activation by 50  $\mu$ M acetylcholine and 1–62  $\mu$ M at 300  $\mu$ M acetylcholine. Vecuronium and d-tubocurarine were most potent as inhibitors at the  $\alpha_3\beta_2$  subtype independent of acetylcholine concentration, whereas mivacurium had the lowest potency of all the nondepolarizing NMBAs and did not reduce the 300- $\mu$ M acetylcholine response at concentrations lower than 100  $\mu$ M. For atracurium, cisatracurium, pancuronium, and rocuronium, an increase from 50 to 300  $\mu$ M acetylcholine slightly increased the  $IC_{50}$  (not significant), suggesting a competitive inhibition or higher affinity to the closed channel. Nondepolarizing NMBAs tended to increase the acetylcholine  $EC_{50}$  for the  $\alpha_3\beta_2$  nAChR,

although the effect was not statistically significant. The peak acetylcholine current was not reduced by 10  $\mu$ M nondepolarizing NMBAs (fig. 1). Therefore, the inhibition induced by NMBAs at the  $\alpha_3\beta_2$  receptor seems mainly to be competitive, except for d-tubocurarine and vecuronium, where there is a noncompetitive component.

All of the nondepolarizing NMBAs concentration-dependently inhibited the  $\alpha_3\beta_4$  nAChR subtype, with  $IC_{50}$  values from 2 to 20  $\mu$ M and from 0.3 to 2  $\mu$ M for 50 and 300  $\mu$ M acetylcholine, respectively. There was no component of competitive inhibition by the NMBAs at this receptor because the  $IC_{50}$  values were unchanged, or even lower, at the higher acetylcholine concentration

**Table 1. Pharmacologic Properties of NMBAs on Human Neuronal nAChRs Expressed in *Xenopus* Oocytes and Activated by Acetylcholine**

|                       | EC <sub>50</sub> (95% CI), $\mu$ M |               |               |               |               |                |                 |
|-----------------------|------------------------------------|---------------|---------------|---------------|---------------|----------------|-----------------|
|                       | Atracurium                         | Cisatracurium | d-TC          | Mivacurium    | Pancuronium   | Rocuronium     | Vecuronium      |
| $\alpha_3\beta_2$     |                                    |               |               |               |               |                |                 |
| ACh                   | 214                                | 93.75         | 318           | 316           | 273           | 548            | 551             |
|                       | (52.18–880)                        | (24.75–355)   | (54.36–1,827) | (46.40–2,156) | (76.41–978)   | (15.29–19,630) | (65.94–4,597)   |
| ACh + 10 $\mu$ M NMBA | 150 NS                             | 246 NS        | 988 NS        | 345 NS        | 546 NS        | 759 NS         | 687 NS          |
|                       | (15.64–1,441)                      | (26.35–2,301) | (190–5,127)   | (56.48–2,112) | (155–1,921)   | (144–3,987)    | (67.85–6,955)   |
| $\alpha_3\beta_4$     |                                    |               |               |               |               |                |                 |
| ACh                   | 182                                | 235           | 218           | 233           | 300           | 236            | 291             |
|                       | (160–206)                          | (207–268)     | (195–243)     | (199–273)     | (278–324)     | (205–271)      | (224–378)       |
| ACh + 10 $\mu$ M NMBA | 408‡                               | 476‡          | 457†          | 582‡          | 2,193‡        | 383†           | 1,915*          |
|                       | (276–604)                          | (343–660)     | (310–676)     | (357–949)     | (233–20,670)  | (274–534)      | (20.29–180,800) |
| $\alpha_4\beta_2$     |                                    |               |               |               |               |                |                 |
| ACh                   | 3.70                               | 1.98          | 1.62          | 2.36          | 3.20          | 3.52           | 1.92            |
|                       | (2.94–4.66)                        | (1.49–2.63)   | (1.06–2.47)   | (0.59–9.35)   | (2.06–4.96)   | (2.28–5.44)    | (1.28–2.88)     |
| ACh + 10 $\mu$ M NMBA | 6.44†                              | 2.51 NS       | 7.15‡         | 8.43 NS       | 10.07‡        | 1.96 NS        | 7.11‡           |
|                       | (4.80–8.64)                        | (1.94–3.26)   | (5.60–9.13)   | (2.47–28.74)  | (7.19–14.10)  | (1.32–2.90)    | (4.15–12.17)    |
| $\alpha_7$            |                                    |               |               |               |               |                |                 |
| ACh                   | 57.11                              | 41.51         | 35.65         | 42.65         | 29.34         | 36.65          | 53.88           |
|                       | (47.73–68.34)                      | (30.26–56.95) | (29.31–43.35) | (30.20–60.22) | (25.40–33.90) | (30.79–43.63)  | (41.57–69.83)   |
| ACh + 10 $\mu$ M NMBA | 94.83‡                             | 73.95†        | 277‡          | 111‡          | 42.47*        | 66.15‡         | 164‡            |
|                       | (83.88–107)                        | (62.85–87.02) | (250–307)     | (84.88–145)   | (31.44–57.37) | (54.06–80.93)  | (144–186)       |

For each receptor subtype, the half activation concentration (EC<sub>50</sub>) (acetylcholine [ACh]) was compared with the EC<sub>50</sub> (ACh + neuromuscular blocking agent [NMBA]) using an F test and thereafter a *t* test.

\* *P* < 0.05. † *P* < 0.01. ‡ *P* < 0.001.

d-TC = d-tubocurarine; CI = confidence interval; nAChR = nicotinic acetylcholine receptor; NS = not significant.

used (fig. 1 and table 2). Furthermore, addition of the NMBAs to the acetylcholine concentration–response relations both increased the EC<sub>50</sub> (table 1) and reduced peak acetylcholine responses in presence of a NMBA (*P* < 0.05),

independent of concentration. Therefore, the NMBAs seem to inhibit the  $\alpha_3\beta_4$  nAChR subtype in a noncompetitive way. All NMBAs showed higher affinity for the closed channel, except cisatracurium and mivacurium.

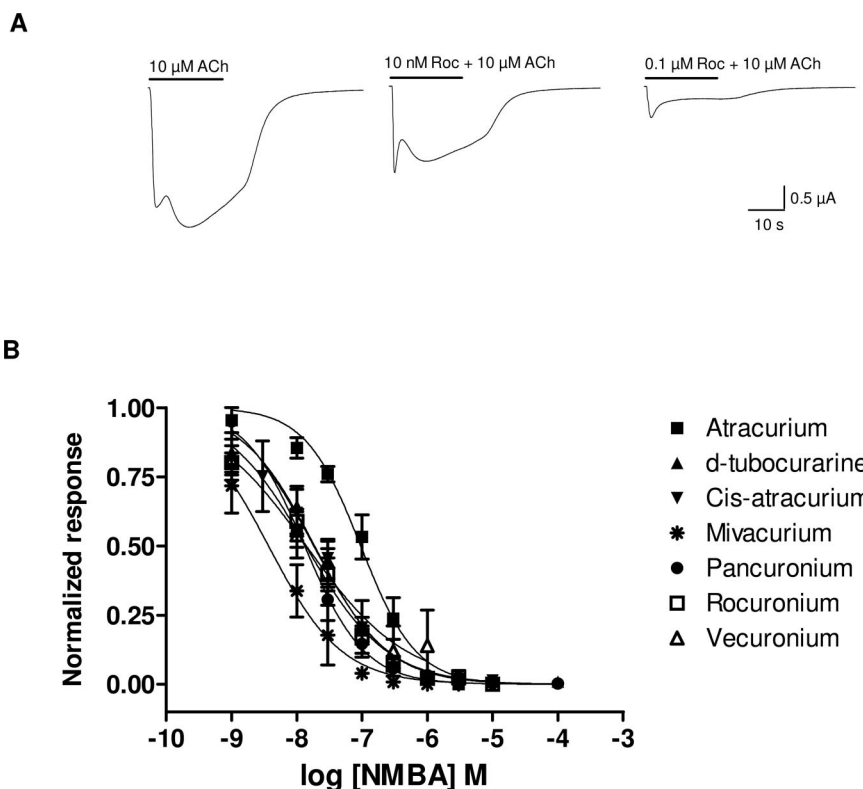

**Fig. 2. Nondepolarizing neuromuscular blocking agents (NMBAs) concentration-dependently inhibit the 10  $\mu$ M acetylcholine (ACh)-induced current response in *Xenopus* oocytes expressing the human muscle ( $\alpha_1\beta_1\epsilon\delta$ ) nicotinic acetylcholine receptor. (A) Representative traces from one oocyte. (B) Current responses in each oocyte were normalized to the 10  $\mu$ M acetylcholine control responses in each oocyte as described in the Materials and Methods. Each symbol represents mean  $\pm$  SEM of 4–7 oocytes. When no error bars are seen, they are smaller than the symbols. Roc = rocuronium.**

**Table 2. Pharmacologic Properties of NMBAs as Inhibitors of Acetylcholine-induced Activation of Human Neuronal nAChRs Expressed in *Xenopus* Oocytes**

|                                 | IC <sub>50</sub> (95% CI), $\mu$ M |                                   |                                   |                                 |                                   |                                |                                |
|---------------------------------|------------------------------------|-----------------------------------|-----------------------------------|---------------------------------|-----------------------------------|--------------------------------|--------------------------------|
|                                 | Atracurium                         | Cisatracurium                     | d-TC                              | Mivacurium                      | Pancuronium                       | Rocuronium                     | Vecuronium                     |
| $\alpha_1\beta_1\epsilon\delta$ |                                    |                                   |                                   |                                 |                                   |                                |                                |
| 10 $\mu$ M ACh                  | 96.65 nM<br>(73.89–123.8)          | 18.19 nM<br>(12.64–26.16)         | 18.73 nM<br>(13.87–25.30)         | 3.69 nM<br>(2.22–6.15)          | 13.17 nM<br>(7.88–22.02)          | 13.76 nM<br>(10.57–17.91)      | 10.74 nM<br>(5.48–21.06)       |
| $\alpha_3\beta_2$               |                                    |                                   |                                   |                                 |                                   |                                |                                |
| 50 $\mu$ M ACh                  | 4.99<br>(3.08–8.09)                | 12.68<br>(5.16–31.16)             | 4.78<br>(2.93–7.81)               | 69.04<br>(46.41–103)            | 13.71<br>(6.92–27.17)             | 8.30<br>(3.54–19.48)           | 3.55<br>(2.32–5.43)            |
| 300 $\mu$ M ACh                 | 9.24 NS<br>(3.72–22.97)            | 28.34 NS<br>(10.23–78.45)         | 2.55 NS<br>(1.42–4.55)            | Do not fit                      | 22.67 NS<br>(7.51–68.44)          | 14.63 NS<br>(5.87–36.46)       | 2.52 NS<br>(0.97–6.57)         |
| $\alpha_3\beta_4$               |                                    |                                   |                                   |                                 |                                   |                                |                                |
| 50 $\mu$ M ACh                  | 11.65<br>(7.63–17.79)              | 1.69<br>(1.21–2.36)               | 19.78<br>(13.18–29.70)            | 3.71<br>(2.56–5.39)             | 7.06<br>(5.07–9.83)               | 4.12<br>(2.80–6.08)            | 1.60<br>(1.35–1.91)            |
| 300 $\mu$ M ACh                 | 0.94 $\ddagger$<br>(0.64–1.38)     | 1.94 NS<br>(1.27–2.98)            | 2.14 $\ddagger$<br>(1.27–3.62)    | 4.58 NS<br>(2.73–7.69)          | 1.92 $\ddagger$<br>(0.94–3.93)    | 0.46 $\ddagger$<br>(0.32–0.66) | 0.29 $\ddagger$<br>(0.15–0.56) |
| $\alpha_4\beta_2$               |                                    |                                   |                                   |                                 |                                   |                                |                                |
| 1 $\mu$ M ACh                   | 7.89<br>(6.38–9.76)                | 13.24<br>(7.61–23.06)             | 1.77<br>(1.47–2.14)               | 1.52<br>(1.10–2.10)             | 3.34<br>(3.06–3.65)               | 1.11<br>(0.85–1.44)            | 1.30<br>(0.88–1.90)            |
| 10 $\mu$ M ACh                  | 21.07 $\ddagger$<br>(15.84–28.02)  | 66.74 $\ddagger$<br>(28.38–156.9) | 5.06 $\ddagger$<br>(4.31–5.94)    | Do not fit                      | 14.70 $\ddagger$<br>(12.52–17.26) | 5.37*<br>(0.83–34.89)          | 4.98 $\ddagger$<br>(3.65–6.79) |
| $\alpha_7$                      |                                    |                                   |                                   |                                 |                                   |                                |                                |
| 30 $\mu$ M ACh                  | 5.56<br>(4.18–7.40)                | 6.19<br>(5.36–7.16)               | 1.52<br>(1.31–1.77)               | 2.90<br>(2.22–3.78)             | 13.33<br>(10.40–17.09)            | 7.55<br>(6.24–9.14)            | 7.70<br>(6.05–9.78)            |
| 100 $\mu$ M ACh                 | 13.03 $\ddagger$<br>(8.96–18.94)   | 14.62 NS<br>(8.77–24.37)          | 38.11 $\ddagger$<br>(28.61–50.76) | 9.92 $\ddagger$<br>(8.00–12.30) | 11.76 NS<br>(9.70–14.26)          | 5.06 $\ddagger$<br>(4.35–5.89) | 8.38 NS<br>(7.29–9.63)         |

For each receptor subtype, the half inhibition concentration (IC<sub>50</sub>) values for each neuromuscular blocking agent (NMBA) was tested using an F test and thereafter a *t* test.

\*  $P < 0.05$ .  $\ddagger P < 0.01$ .  $P < 0.001$ .

ACh = acetylcholine; CI = confidence interval; d-TC = d-tubocurarine; nAChR = nicotinic acetylcholine receptor; NS = not significant.

By contrast, the  $\alpha_4\beta_2$  nAChR subtype was competitively blocked by most of the NMBAs. That is, increasing the concentrations of acetylcholine from 1 to 10  $\mu$ M increased the IC<sub>50</sub> from 1–13  $\mu$ M to 5–67  $\mu$ M. In addition, NMBAs generally right-shifted the acetylcholine concentration–response relations without reducing the peak response at the  $\alpha_4\beta_2$  nAChR (fig. 1), further suggesting a competitive mode of inhibition. However, 10  $\mu$ M rocuronium significantly reduced the peak response to all concentrations of acetylcholine tested (fig. 1), and thus, its inhibition is noncompetitive. Further, rocuronium seemed to desensitize the  $\alpha_4\beta_2$  receptor because the control responses after both the acetylcholine concentration–response experiment with rocuronium and after the rocuronium inhibition experiment with 10  $\mu$ M acetylcholine did not return to 80% of the control response in most of the series, which were therefore excluded (see Material and Methods, Protocol). Interestingly, rocuronium inhibition experiments with 1  $\mu$ M acetylcholine did not show this pattern. Rocuronium therefore inhibits the  $\alpha_3\beta_4$  and  $\alpha_4\beta_2$  subtypes noncompetitively and with variable state dependency.<sup>38</sup>

All NMBAs concentration-dependently right-shifted the acetylcholine concentration–response curve for the  $\alpha_7$  nAChR subtype, with increased EC<sub>50</sub> values (table 1), but did not reduce peak responses (not significant). In gen-

eral, the inhibition of 30 and 100  $\mu$ M acetylcholine at the  $\alpha_7$  nAChR subtype by NMBAs was concentration dependent (table 2), suggesting that NMBAs inhibit the  $\alpha_7$  nAChR subtype in a competitive manner. However, for rocuronium, the IC<sub>50</sub> decreased with increased acetylcholine concentration (table 2), indicating a noncompetitive component in the action of rocuronium at the  $\alpha_7$  nAChR subtype.

#### Nondepolarizing Neuromuscular Blocking Agents Do Not Activate Human nAChRs

Application of 1 nM to 100  $\mu$ M atracurium, cisatracurium, d-tubocurarine, mivacurium, pancuronium, rocuronium, or vecuronium to oocytes expressing human muscle ( $\alpha_1\beta_1\epsilon\delta$ ) or neuronal ( $\alpha_3\beta_2$ ,  $\alpha_3\beta_4$ ,  $\alpha_4\beta_2$ , and  $\alpha_7$ ) nAChRs did not result in receptor activation (data not shown).

## Discussion

This study shows that nondepolarizing NMBAs inhibit neuronal nAChRs and that the inhibitory mechanism differs between individual receptor subtypes and NMBAs. In addition, we found no evidence that the nAChR subtypes tested were activated by any of the nondepolarizing NMBAs.

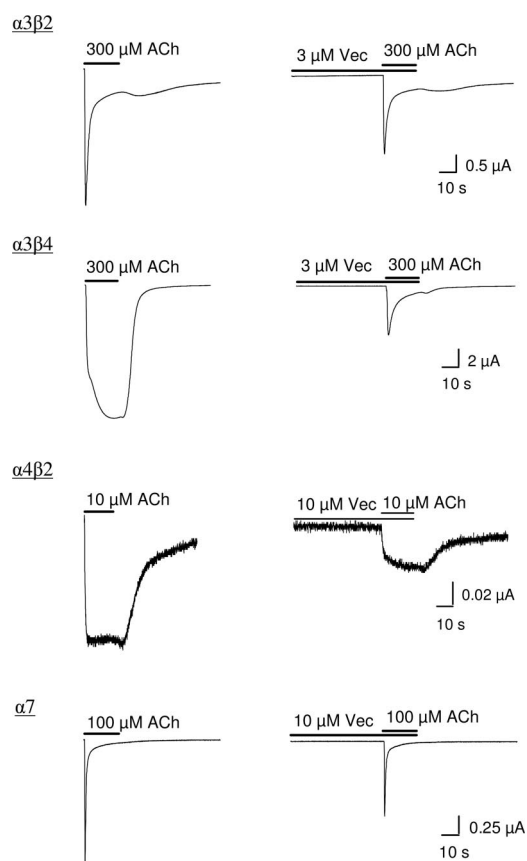

**Fig. 3.** Representative traces of vecuronium-induced inhibition of acetylcholine (ACh) currents in *Xenopus* oocytes expressing the human  $\alpha_3\beta_2$ ,  $\alpha_3\beta_4$ ,  $\alpha_4\beta_2$ , and  $\alpha_7$  nicotinic acetylcholine receptor subtypes. Vecuronium (Vec) was preapplied for 55 s before a 20-s coapplication with acetylcholine as indicated with the horizontal bars. For each receptor subtype, traces shown in each row are from the same oocyte.

All the nondepolarizing NMBAs reversibly and concentration-dependently inhibited the neuronal  $\alpha_3\beta_2$ ,  $\alpha_3\beta_4$ ,  $\alpha_4\beta_2$ , and  $\alpha_7$  nAChR subtypes in the micromolar range. Hence, the block occurs at clinically relevant concentrations.<sup>39</sup> In general, nondepolarizing NMBAs block the  $\alpha_4\beta_2$ ,  $\alpha_3\beta_2$ , and  $\alpha_7$  subtypes in a competitive manner; the exception is the  $\alpha_3\beta_4$  subtype, where the block seems noncompetitive. However, the nondepolarizing NMBAs have individual action profiles on different receptors. Mivacurium had rather low potency at the  $\alpha_3\beta_2$  nAChR, whereas the other NMBAs showed similar  $IC_{50}$  values across the nAChRs tested.

Nondepolarizing NMBAs have higher functional affinity for the  $\alpha_1\beta_1\epsilon\delta$  nAChR subtype than for the neuronal nAChR subtypes, as determined by current amplitude measurements. For the muscle nAChR, the  $IC_{50}$  values (nanomolar range) presented here as well as in other studies using the *Xenopus* oocyte expression system<sup>20,23,37</sup> contrast with the micromolar concentrations of NMBAs needed to reduce the nerve-evoked twitch by 50% in isolated rat nerve-muscle preparations<sup>40</sup> and in the clinical setting.<sup>39</sup> This apparent discrepancy proba-

bly reflects the large safety factor in the neuromuscular transmission, where approximately 75% of the receptors must be occupied by a nondepolarizing NMBA before there is any reduction in twitch tension, and 90% occupancy is required for full paralysis.<sup>41</sup> This safety factor has not been reported for the neuronal nAChRs as far as we know.

In addition to inhibiting nAChRs, nondepolarizing NMBAs have also been described as partial agonists at both muscle and neuronal nAChR subtypes.<sup>21,23,32</sup> Atracurium-induced activation of the  $\alpha_4\beta_2$  nAChR subtype occurs at very low concentrations, even lower than those required for inhibition.<sup>21</sup> However, the reports are contradictory, because Garland *et al.*<sup>20</sup> were unable to show any activation of the  $\alpha_1\beta_1\gamma\delta$  or  $\alpha_1\beta_1\epsilon\delta$  nAChR subtype induced by d-tubocurarine or pancuronium. Here, we did not observe activation of the nAChRs by any of the seven nondepolarizing NMBAs studied. One possible explanation for this discrepancy might be that our study, in contrast to the previous one,<sup>21</sup> did not use atropine in the perfusion buffer. A low concentration of atropine (*i.e.*, 0.5  $\mu$ M) has commonly been used to prevent activation of putative endogenous muscarinic receptors at the epithelial layer of the *Xenopus* oocyte surface.<sup>42,43</sup> However, during recent years, it has become clear that there is no endogenous surface expression of muscarinic receptors in *Xenopus* oocytes themselves,<sup>44</sup> and furthermore, it has been shown that atropine can both inhibit and activate nAChR expressed in the *Xenopus* oocyte.<sup>44</sup> Notably, the  $\alpha_4\beta_2$  subtype is activated by atropine; therefore, we suggest that the activation of the  $\alpha_4\beta_2$  subtype previously attributed to atracurium might instead have been elicited by atropine. For the muscle-type nAChR, we could not record any activation of the  $\alpha_1\beta_1\epsilon\delta$  nAChR subtype, thus confirming observations reported in previous studies.<sup>20,23,24</sup>

Many of the nondepolarizing NMBAs tested have breakdown products with potential to block muscle nAChRs<sup>39</sup>; however, most of the nondepolarizing NMBAs are not degraded *in vitro*. Atracurium and cisatracurium can to some extent undergo spontaneous degradation to laudanosine by Hofmann reaction *in vitro*,<sup>45</sup> depending mainly on temperature and pH, and although we controlled these parameters, we cannot exclude some contamination of laudanosine. Laudanosine has been shown to block the neuronal  $\alpha_3\beta_4$ ,  $\alpha_4\beta_2$ , and  $\alpha_7$  in a noncompetitive manner with  $IC_{50}$  values of 8–38  $\mu$ M.<sup>21,22</sup> Because both atracurium and cisatracurium inhibit the  $\alpha_4\beta_2$  and  $\alpha_7$  nAChRs in a competitive way, we consider it unlikely that there is any substantial involvement of laudanosine under our experimental conditions.

To date, only one study investigating the effect of clinically used nondepolarizing NMBAs on nAChRs has used human DNA<sup>21</sup>; all of the others have used rat and mouse DNA.<sup>20,24,37</sup> Although there is more than 80% homology between the human and rodent nAChR sub-



$\alpha_3\beta_2$ 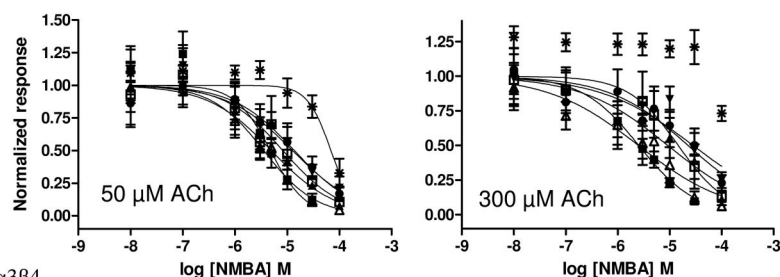 $\alpha_3\beta_4$ 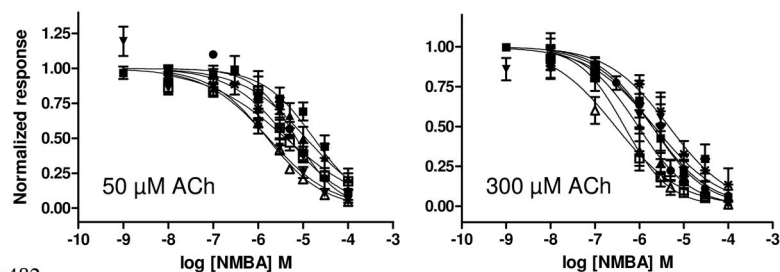 $\alpha_4\beta_2$ 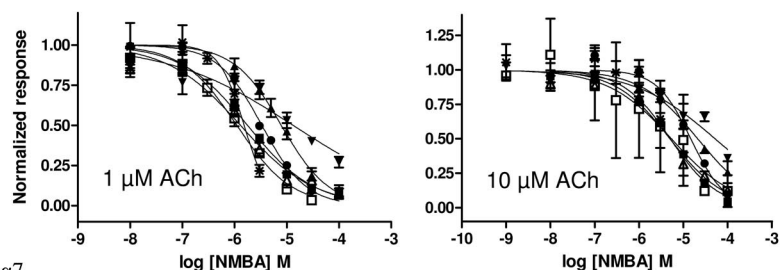 $\alpha_7$ 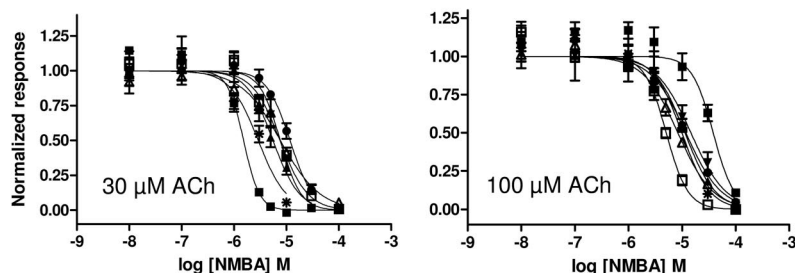

- ▲ Atracurium
- ▼ Cis-atracurium
- d-tubocurarine
- \* Mivacurium
- Pancuronium
- Rocuronium
- △ Vecuronium

Fig. 4. Concentration-response curves of the inhibition of acetylcholine (ACh)-mediated response by nondepolarizing neuromuscular blocking agents (NMBAs) in human  $\alpha_3\beta_2$ ,  $\alpha_3\beta_4$ ,  $\alpha_4\beta_2$ , and  $\alpha_7$  nicotinic acetylcholine receptor expressed in *Xenopus* oocytes. For each receptor subtype, two acetylcholine concentrations were applied, one lower and one higher than the  $\text{EC}_{50}$ : 50 and 300  $\mu\text{M}$  for  $\alpha_3\beta_2$  and  $\alpha_3\beta_4$ , 1 and 10  $\mu\text{M}$  for  $\alpha_4\beta_2$ , and 30 and 100  $\mu\text{M}$  for  $\alpha_7$ . Control acetylcholine peak current or net charge ( $\alpha_7$ ) responses in each oocyte were normalized to the acetylcholine response with respective nondepolarizing NMBA added, yielding the concentration-response relations. For each receptor subtype, 4–11 oocytes were studied. Data are presented as mean  $\pm$  SEM. When no error bars are seen, they are smaller than the symbols.

unit DNA,<sup>6</sup> a small difference in amino acid sequence can cause significant changes in biophysical and pharmacologic properties of the receptors.<sup>18</sup> Therefore, we believe that our study directly comparing the effect of the clinically used NMBAs at the human receptors in the same system adds to the current knowledge on basic pharmacologic properties of nondepolarizing NMBAs.

The mechanisms of the block of neuromuscular transmission by nondepolarizing NMBAs are likely dual; the most important is a postsynaptic block at the  $\alpha_1\beta_1\epsilon\delta$  nAChR subtype, but there is also an inhibition of presynaptic cholinergic receptors.<sup>2,3,46</sup> It has become evident that the tetanic and TOF fade phenomena induced by nondepolarizing relaxants most likely arise from a block

of the presynaptic  $\alpha_3\beta_2$  nicotinic receptor.<sup>1,2,5</sup> Interestingly, recent data indicate that adenosine and adenosine triphosphate interacting with purinergic receptors also are important in mobilization and release of acetylcholine from the motor nerve ending.<sup>47,48</sup> Here, we can for the first time show that clinically used nondepolarizing NMBAs inhibit the  $\alpha_3\beta_2$  nAChR subtype in the micromolar concentration range, thus providing a molecular explanation for the tetanic and TOF fade seen during neuromuscular blockade by nondepolarizing NMBAs. However, mivacurium, which had a lower affinity for the  $\alpha_3\beta_2$  nAChR, nonetheless elicited fade, indicated that a block of the  $\alpha_3\beta_2$  nAChR is probably not the only mechanism behind tetanic and TOF fade. The reduction in



peak tension and TOF fade seen during neuromuscular monitoring are likely caused by two separate events,<sup>1-3,46</sup> namely the presynaptic and the postsynaptic inhibition by nondepolarizing NMBAs. This also explains the clinical observations that nondepolarizing NMBAs differ in the degree of twitch reduction *versus* tetanic and TOF fade.<sup>49</sup> Furthermore, animal studies of the twitch tension and tetanic fade clearly show that these events are due to two separate mechanisms. Hexamethonium produced a complete tetanic fade without any twitch depression; pancuronium produced tetanic fade in doses that also produced pronounced twitch depression;  $\alpha$ -bungarotoxin did not produce tetanic fade but elicited a pronounced twitch depression.<sup>50</sup> Comparing this study to our results, it is clear that nondepolarizing NMBAs have a much higher affinity for the  $\alpha_1\beta_1\epsilon\delta$  nAChR subtype compared with the  $\alpha_3\beta_2$  subtype, but still, the IC<sub>50</sub> values for the  $\alpha_3\beta_2$  nAChR subtype are in a clinically relevant range and furthermore correspond roughly to the concentrations that produce a 50% neuromuscular block in *in vitro* animal experiments (1.68–12.3  $\mu$ M).<sup>40,50</sup> In addition, we have recently shown that succinylcholine, which does not produce tetanic or TOF fade at normal dosage, does not block the  $\alpha_3\beta_2$  nAChR subtype at clinically relevant concentrations.<sup>33</sup> The fact that nondepolarizing NMBAs do block the  $\alpha_3\beta_2$  nAChR subtype in clinically relevant concentrations, and the fact that succinylcholine does not, strongly support the concept that the clinically observed tetanic and TOF fade are due to a block of the presynaptic  $\alpha_3\beta_2$  nAChR subtype.

Based on our results, nondepolarizing NMBAs have the potential to inhibit neuronal nAChRs present in peripheral autonomic ganglia.

It has previously been shown that nondepolarizing NMBAs reduce hypoxic ventilatory response in humans<sup>14,15</sup> and furthermore impair both the hypoxic and nicotine-induced carotid body chemoreceptor response.<sup>16,17,51,52</sup> Neuronal nAChRs have been found to be present and functional in the carotid body and its afferent system.<sup>53–55</sup> We believe that the affinity of NMBAs to the human neuronal subtypes of nAChRs is a key component behind the interaction between nondepolarizing NMBAs and regulation of breathing during hypoxia. We also speculate whether the block of the  $\alpha_7$  nAChR subtype may have an impact on the cholinergic inflammatory reflex mediated *via* the vagus nerve<sup>25,26</sup> and thus on outcome for patients with inflammatory conditions such as sepsis.

In summary, neuronal nAChRs are widespread in the central and peripheral nervous system, as well as in extraneuronal tissues, and a block of these receptors by nondepolarizing NMBAs might interfere with important vital functions.

We conclude that nondepolarizing NMBAs concentration-dependently inhibit human neuronal nAChRs ex-

pressed in *Xenopus* oocytes and that the inhibition mechanisms vary between different receptor subtypes and NMBAs. The inhibition of the presynaptic  $\alpha_3\beta_2$  nAChR subtype at the motor nerve end provides a possible molecular explanation for the tetanic and TOF fade seen during a nondepolarizing neuromuscular block.

The authors thank Professor Bertil Fredholm, M.D., Ph.D. (Department of Physiology and Pharmacology, Karolinska Institutet, Stockholm, Sweden), for advice and constructive criticism.

## References

1. Vizi ES, Lendvai B: Side effects of nondepolarizing muscle relaxants: Relationship to their antinicotinic and antimuscarinic actions. *Pharmacol Ther* 1997; 73:75–89
2. Bowman WC, Prior C, Marshall IG: Presynaptic receptors in the neuromuscular junction. *Ann N Y Acad Sci* 1990; 604:69–81
3. Prior C, Tian L, Dempster J, Marshall IG: Prejunctional actions of muscle relaxants: Synaptic vesicles and transmitter mobilization as sites of action. *Gen Pharmacol* 1995; 26:659–66
4. Tsuneki H, Kimura I, Dezaki K, Kimura M, Sala C, Fumagalli G: Immunohistochemical localization of neuronal nicotinic receptor subtypes at the pre- and postjunctional sites in mouse diaphragm muscle. *Neurosci Lett* 1995; 196:13–6
5. Faria M, Oliveira L, Timoteo MA, Lobo MG, Correia-De-Sa P: Blockade of neuronal facilitatory nicotinic receptors containing alpha 3 beta 2 subunits contribute to tetanic fade in the rat isolated diaphragm. *Synapse* 2003; 49:77–88
6. Lukas RJ, Changeux JP, Le Novère N, Albuquerque EX, Balfour DJ, Berg DK, Bertrand D, Chiappinelli VA, Clarke PB, Collins AC, Dani JA, Grady SR, Kellar KJ, Lindstrom JM, Marks MJ, Quik M, Taylor PW, Wonnacott S: International Union of Pharmacology: XX. Current status of the nomenclature for nicotinic acetylcholine receptors and their subunits. *Pharmacol Rev* 1999; 51:397–401
7. Gotti C, Clementi F: Neuronal nicotinic receptors: From structure to pathology. *Prog Neurobiol* 2004; 74:363–96
8. Lindstrom JM: Nicotinic acetylcholine receptors of muscles and nerves: Comparison of their structures, functional roles, and vulnerability to pathology. *Ann N Y Acad Sci* 2003; 998:41–52
9. Hogg RC, Raggenbass M, Bertrand D: Nicotinic acetylcholine receptors: From structure to brain function. *Rev Physiol Biochem Pharmacol* 2003; 147: 1–46
10. Paterson D, Nordberg A: Neuronal nicotinic receptors in the human brain. *Prog Neurobiol* 2000; 61:75–111
11. Bibevski S, Zhou Y, McIntosh JM, Zigmond RE, Dunlap ME: Functional nicotinic acetylcholine receptors that mediate ganglionic transmission in cardiac parasympathetic neurons. *J Neurosci* 2000; 20:5076–82
12. Hogg RC, Miranda LP, Craik DJ, Lewis RJ, Alewood PF, Adams DJ: Single amino acid substitutions in alpha-conotoxin PnIA shift selectivity for subtypes of the mammalian neuronal nicotinic acetylcholine receptor. *J Biol Chem* 1999; 274:36559–64
13. Iturriaga R, Alcayaga J: Neurotransmission in the carotid body: Transmitters and modulators between glomus cells and petrosal ganglion nerve terminals. *Brain Res Brain Res Rev* 2004; 47:46–53
14. Eriksson LI: Reduced hypoxic chemosensitivity in partially paralysed man: A new property of muscle relaxants? *Acta Anaesthesiol Scand* 1996; 40:520–3
15. Eriksson LI, Lennmarken C, Wyon N, Johnson A: Attenuated ventilatory response to hypoxaemia at vecuronium-induced partial neuromuscular block. *Acta Anaesthesiol Scand* 1992; 36:710–5
16. Wyon N, Joensen H, Yamamoto Y, Lindahl SG, Eriksson LI: Carotid body chemoreceptor function is impaired by vecuronium during hypoxia. *ANESTHESIOLOGY* 1998; 89:1471–9
17. Jonsson M, Wyon N, Lindahl SG, Fredholm BB, Eriksson LI: Neuromuscular blocking agents block carotid body neuronal nicotinic acetylcholine receptors. *Eur J Pharmacol* 2004; 497:173–80
18. Chavez-Noriega LE, Crona JH, Washburn MS, Urrutia A, Elliott KJ, Johnson EC: Pharmacological characterization of recombinant human neuronal nicotinic acetylcholine receptors h alpha 2 beta 2, h alpha 2 beta 4, h alpha 3 beta 2, h alpha 3 beta 4, h alpha 4 beta 2, h alpha 4 beta 4 and h alpha 7 expressed in *Xenopus* oocytes. *J Pharmacol Exp Ther* 1997; 280:346–56
19. Bertrand D, Ballivet M, Rungger D: Activation and blocking of neuronal nicotinic acetylcholine receptor reconstituted in *Xenopus* oocytes. *Proc Natl Acad Sci U S A* 1990; 87:1993–7
20. Garland CM, Foreman RC, Chad JE, Holden-Dye L, Walker RJ: The actions of muscle relaxants at nicotinic acetylcholine receptor isoforms. *Eur J Pharmacol* 1998; 357:83–92
21. Chiodini F, Charpentier E, Muller D, Tassonyi E, Fuchs-Buder T, Bertrand D: Blockade and activation of the human neuronal nicotinic acetylcholine receptors by atracurium and laudanosine. *ANESTHESIOLOGY* 2001; 94:643–51
22. Exley R, Iturriaga-Vasquez P, Lukas RJ, Sher E, Cassels BK, Bermudez I:

Evaluation of benzyltetrahydroisoquinolines as ligands for neuronal nicotinic acetylcholine receptors. *Br J Pharmacol* 2005; 146:15-24

23. Fletcher GH, Steinbach JH: Ability of nondepolarizing neuromuscular blocking drugs to act as partial agonists at fetal and adult mouse muscle nicotinic receptors. *Mol Pharmacol* 1996; 49:938-47

24. Yost CS, Winegar BD: Potency of agonists and competitive antagonists on adult- and fetal-type nicotinic acetylcholine receptors. *Cell Mol Neurobiol* 1997; 17:35-50

25. Tracey KJ: The inflammatory reflex. *Nature* 2002; 420:853-9

26. Wang H, Yu M, Ochani M, Amella CA, Tanovic M, Susarla S, Li JH, Yang H, Ulloa L, Al-Abed Y, Czura CJ, Tracey KJ: Nicotinic acetylcholine receptor  $\alpha 7$  subunit is an essential regulator of inflammation. *Nature* 2003; 421:384-8

27. Segredo V, Matthay MA, Sharma ML, Gruenke LD, Caldwell JE, Miller RD: Prolonged neuromuscular blockade after long-term administration of vecuronium in two critically ill patients. *ANESTHESIOLOGY* 1990; 72:566-70

28. Matteo RS, Pua EK, Khambatta HJ, Spector S: Cerebrospinal fluid levels of d-tubocurarine in man. *ANESTHESIOLOGY* 1977; 46:396-9

29. Tassonyi E, Fathi M, Hughes GJ, Chiodini F, Bertrand D, Muller D, Fuchs-Buder T: Cerebrospinal fluid concentrations of atracurium, laudanosine and vecuronium following clinical subarachnoid hemorrhage. *Acta Anaesthesiol Scand* 2002; 46:1236-41

30. Chiodini FC, Tassonyi E, Fuchs-Buder T, Fathi M, Bertrand D, Muller D: Effects of neuromuscular blocking agents on excitatory transmission and  $\gamma$ -aminobutyric acid<sub>A</sub>-mediated inhibition in the rat hippocampal slice. *ANESTHESIOLOGY* 1998; 88:1003-13

31. Szenohradszky J, Trevor AJ, Bickler P, Caldwell JE, Sharma ML, Rampil JJ, Miller RD: Central nervous system effects of intrathecal muscle relaxants in rats. *Anesth Analg* 1993; 76:1304-9

32. Cardone C, Szenohradszky J, Yost S, Bickler PE: Activation of brain acetylcholine receptors by neuromuscular blocking drugs: A possible mechanism of neurotoxicity. *ANESTHESIOLOGY* 1994; 80:1155-61

33. Jonsson M, Dabrowski M, Gurley DA, Larsson O, Johnson EC, Fredholm BB, Eriksson LI: Activation and inhibition of human muscular and neuronal nicotinic acetylcholine receptors by succinylcholine. *ANESTHESIOLOGY* 2006; 104:724-33

34. Papke RL, Porter Papke JK: Comparative pharmacology of rat and human  $\alpha 7$  nAChR conducted with net charge analysis. *Br J Pharmacol* 2002; 137:49-61

35. Papke RL, Thinschmidt JS: The correction of  $\alpha 7$  nicotinic acetylcholine receptor concentration-response relationships in *Xenopus* oocytes. *Neurosci Lett* 1998; 256:163-6

36. Hatton CJ, Shelley C, Brydson M, Beeson D, Colquhoun D: Properties of the human muscle nicotinic receptor, and of the slow-channel myasthenic syndrome mutant  $\epsilon$ -L221F, inferred from maximum likelihood fits. *J Physiol* 2003; 547:729-60

37. Paul M, Kindler CH, Fokt RM, Dresser MJ, Dipp NC, Yost CS: The potency of new muscle relaxants on recombinant muscle-type acetylcholine receptors. *Anesth Analg* 2002; 94:597-603

38. Unwin N: Acetylcholine receptor channel imaged in the open state. *Nature* 1995; 373:37-43

39. Naguib M, Lien CA: Pharmacology of muscle relaxants and their antagonists, Miller's Anesthesia. Edited by Miller RD. Philadelphia, Elsevier, 2005, pp 481-572

40. Fortier LP, Robitaille R, Donati F: Increased sensitivity to depolarization and nondepolarizing neuromuscular blocking agents in young rat hemidiaphragms. *ANESTHESIOLOGY* 2001; 95:478-84

41. Tuba Z, Maho S, Vizi ES: Synthesis and structure-activity relationships of neuromuscular blocking agents. *Curr Med Chem* 2002; 9:1507-36

42. Kusano K, Milei R, Stinnakre J: Cholinergic and catecholaminergic receptors in the *Xenopus* oocyte membrane. *J Physiol* 1982; 328:143-70

43. Dascal N, Landau EM, Lass Y: *Xenopus* oocyte resting potential, muscarinic responses and the role of calcium and guanosine 3',5'-cyclic monophosphate. *J Physiol* 1984; 352:551-74

44. Zwart R, Vijverberg HP: Potentiation and inhibition of neuronal nicotinic receptors by atropine: Competitive and noncompetitive effects. *Mol Pharmacol* 1997; 52:886-95

45. Stenlake JB, Waigh RD, Urwin J, Dewar GH, Coker GG: Atracurium: Conception and inception. *Br J Anaesth* 1983; 55 (suppl 1):3S-10S

46. Bowman WC: Prejunctional and postjunctional cholinergic receptors at the neuromuscular junction. *Anesth Analg* 1980; 59:935-43

47. Timoteo MA, Faria M, Correia-de-Sa P: Endogenous adenosine prevents post-tetanic release facilitation mediated by  $\alpha 3\beta 2$  nicotinic autoreceptors. *Eur J Pharmacol* 2003; 464:115-25

48. Baxter RL, Vega-Riveroll LJ, Deuchars J, Parson SH: A2A adenosine receptors are located on presynaptic motor nerve terminals in the mouse. *Synapse* 2005; 57:229-34

49. Gibson FM, Mirakhur RK: Tetanic fade following administration of nondepolarizing neuromuscular blocking drugs. *Anesth Analg* 1989; 68:759-62

50. Bowman WC, Webb SN: Tetanic fade during partial transmission failure produced by non-depolarizing neuromuscular blocking drugs in the cat. *Clin Exp Pharmacol Physiol* 1976; 3:545-55

51. Jonsson M, Kim C, Yamamoto Y, Runold M, Lindahl SG, Eriksson LI: Atracurium and vecuronium block nicotine-induced carotid body chemoreceptor responses. *Acta Anaesthesiol Scand* 2002; 46:488-94

52. Igarashi A, Amagasa S, Horikawa H, Shirahata M: Vecuronium directly inhibits hypoxic neurotransmission of the rat carotid body. *Anesth Analg* 2002; 94:117-22

53. Cohen G, Han ZY, Grailhe R, Gallego J, Gaultier C, Changeux JP, Lagercrantz H: Beta 2 nicotinic acetylcholine receptor subunit modulates protective responses to stress: A receptor basis for sleep-disordered breathing after nicotine exposure. *Proc Natl Acad Sci U S A* 2002; 99:13272-7

54. Higashi T, McIntosh JM, Shirahata M: Characterization of nicotinic acetylcholine receptors in cultured arterial chemoreceptor cells of the cat. *Brain Res* 2003; 974:167-75

55. Shirahata M, Ishizawa Y, Rudisill M, Schofield B, Fitzgerald RS: Presence of nicotinic acetylcholine receptors in cat carotid body afferent system. *Brain Res* 1998; 814:213-7

## Appendix 1: Pharmacologic Properties of Human Neuronal nAChRs Activated by Acetylcholine and with the Addition of NMBAs

|                     | $\alpha_3\beta_2$          |                |    | $\alpha_3\beta_4$          |                |    | $\alpha_4\beta_2$          |                |    | $\alpha_7$                 |                |    |
|---------------------|----------------------------|----------------|----|----------------------------|----------------|----|----------------------------|----------------|----|----------------------------|----------------|----|
|                     | EC <sub>50</sub> , $\mu$ M | n <sub>H</sub> | n  | EC <sub>50</sub> , $\mu$ M | n <sub>H</sub> | n  | EC <sub>50</sub> , $\mu$ M | n <sub>H</sub> | n  | EC <sub>50</sub> , $\mu$ M | n <sub>H</sub> | n  |
| Atracurium          |                            |                |    |                            |                |    |                            |                |    |                            |                |    |
| ACh                 | 214<br>(52.18–880)         | 0.60 ± 0.23    | 12 | 182<br>(160–206)           | 2.20 ± 0.23    | 6  | 3.70<br>(2.94–4.66)        | 0.83 ± 0.08    | 8  | 210<br>(88.35–498)         | 1.24 ± 0.58    | 4  |
|                     | 67.39<br>(26.67–170)       | 0.59 ± 0.21    | 12 | 183<br>(145–232)           | 2.59 ± 0.51    | 5  | 3.99<br>(2.92–5.45)        | 0.82 ± 0.11    | 8  | 57.11<br>(47.73–68.34)     | 1.53 ± 0.17    | 5  |
| ACh + atracurium    | 150<br>(15.64–1,441)       | 0.49 ± 0.31    | 12 | 408<br>(276–604)           | 1.47 ± 0.35    | 6  | 6.44<br>(4.80–8.64)        | 1.00 ± 0.13    | 8  | 1,677<br>(21–133,700)      | 0.80 ± 0.51    | 4  |
|                     | 71.43<br>(10.58–482)       | 0.42 ± 0.29    | 12 | 606<br>(117–3,139)         | 1.11 ± 0.66    | 5  | 6.43<br>(4.67–8.85)        | 0.92 ± 0.12    | 8  | 94.83<br>(84.88–107)       | 2.12 ± 0.29    | 5  |
| Cisatracurium       |                            |                |    |                            |                |    |                            |                |    |                            |                |    |
| ACh                 | 93.75<br>(24.76–355)       | 0.54 ± 0.25    | 7  | 235<br>(207–268)           | 2.28 ± 0.31    | 12 | 1.98<br>(1.49–2.63)        | 1.48 ± 0.29    | 8  | 213<br>(138–230)           | 1.35 ± 0.36    | 6  |
|                     | 46.83<br>(16.51–133)       | 0.45 ± 0.17    | 7  | 269<br>(242–299)           | 2.31 ± 0.31    | 12 | 1.79<br>(1.35–3.38)        | 1.45 ± 0.28    | 8  | 41.51<br>(30.26–56.95)     | 1.21 ± 0.20    | 3  |
| ACh + cisatracurium | 246<br>(26.35–2,301)       | 0.40 ± 0.18    | 7  | 476<br>(343–660)           | 1.92 ± 0.42    | 12 | 2.51<br>(1.94–3.26)        | 1.30 ± 0.21    | 8  | 236<br>(187–298)           | 1.87 ± 0.37    | 6  |
|                     | 10.48<br>(1.44–76.28)      | 0.46 ± 0.18    | 7  | 838<br>(493–1,422)         | 1.15 ± 0.19    | 12 | 2.32<br>(1.88–2.85)        | 1.40 ± 0.19    | 8  | 73.95<br>(62.85–87.02)     | 1.64 ± 0.18    | 3  |
| d-TC                |                            |                |    |                            |                |    |                            |                |    |                            |                |    |
| ACh                 | 318<br>(54.36–1,827)       | 0.75 ± 0.37    | 8  | 218<br>(195–243)           | 2.01 ± 0.19    | 14 | 1.62<br>(1.06–2.47)        | 0.89 ± 0.15    | 8  | 177<br>(133–237)           | 2.37 ± 0.53    | 4  |
|                     | 176<br>(36.96–835)         | 0.71 ± 0.37    | 7  | 197<br>(177–220)           | 2.66 ± 0.26    | 14 | 1.96<br>(1.50–2.57)        | 1.09 ± 0.15    | 7  | 35.65<br>(29.32–43.36)     | 1.61 ± 0.22    | 5  |
| ACh + d-TC          | 988<br>(190–5,127)         | 0.79 ± 0.25    | 8  | 457<br>(310–676)           | 1.41 ± 0.31    | 14 | 7.15<br>(5.60–9.13)        | 1.18 ± 0.15    | 8  | 502<br>(44.10–57,130)      | 2.94 ± 9.2     | 4  |
|                     | 713<br>(1.70–298,000)      | 0.44 ± 0.34    | 7  | 560<br>(168–1,866)         | 1.10 ± 0.51    | 14 | 5.03<br>(3.98–6.37)        | 1.24 ± 0.15    | 7  | 277<br>(250–307)           | 2.14 ± 0.24    | 5  |
| Mivacurium          |                            |                |    |                            |                |    |                            |                |    |                            |                |    |
| ACh                 | 316<br>(46.40–2,156)       | 0.74 ± 0.40    | 5  | 233<br>(199–273)           | 1.91 ± 0.26    | 8  | 2.36<br>(0.59–9.35)        | 0.79 ± 0.29    | 5  | 233<br>(170–319)           | 1.56 ± 0.35    | 8  |
|                     | 85.18<br>(33.95–214)       | 0.69 ± 0.25    | 5  | 240<br>(202–286)           | 2.11 ± 0.36    | 7  | 2.03<br>(0.69–6.00)        | 1.05 ± 0.41    | 5  | 42.65<br>(30.20–60.22)     | 1.18 ± 0.22    | 7  |
| ACh + mivacurium    | 345<br>(56.48–2,112)       | 0.70 ± 0.33    | 5  | 582<br>(347–949)           | 1.17 ± 0.28    | 8  | 8.43<br>(2.47–28.74)       | 0.97 ± 0.59    | 5  | 290<br>(217–388)           | 1.91 ± 0.52    | 8  |
|                     | 128<br>(9.39–1,745)        | 0.46 ± 0.35    | 5  | 860<br>(481–1,538)         | 1.36 ± 0.45    | 7  | 5.27<br>(1.80–15.42)       | 1.17 ± 0.61    | 5  | 111<br>(84.88–145)         | 1.62 ± 0.33    | 7  |
| Pancuronium         |                            |                |    |                            |                |    |                            |                |    |                            |                |    |
| ACh                 | 273<br>(76.41–978)         | 0.80 ± 0.34    | 8  | 300<br>(278–324)           | 4.26 ± 3.78    | 5  | 3.20<br>(2.06–4.96)        | 0.84 ± 0.16    | 13 | 96.55<br>(71.42–130)       | 2.83 ± 2.29    | 6  |
|                     | 328.3<br>(71.13–1,515)     | 0.59 ± 0.20    | 7  | 294<br>(183–474)           | 6.56 ± 85.40   | 5  | 3.12<br>(2.26–4.30)        | 0.91 ± 0.13    | 14 | 29.34<br>(25.40–33.90)     | 2.68 ± 0.75    | 4  |
| ACh + pancuronium   | 546<br>(155–1,921)         | 0.75 ± 0.22    | 8  | 2,193<br>(233–20,670)      | 1.20 ± 0.54    | 5  | 10.07<br>(7.19–14.10)      | 1.00 ± 0.16    | 13 | 175<br>(99.52–309)         | 2.18 ± 0.95    | 5  |
|                     | 82.01<br>(12.28–548)       | 0.51 ± 0.35    | 7  | 3,966<br>(9.28–169,400)    | 0.87 ± 0.56    | 5  | 6.89<br>(5.06–9.37)        | 1.22 ± 0.20    | 14 | 42.47<br>(31.44–57.37)     | 1.75 ± 0.37    | 3  |
| Rocuronium          |                            |                |    |                            |                |    |                            |                |    |                            |                |    |
| ACh                 | 548<br>(15.29–19,630)      | 0.55 ± 0.33    | 11 | 236<br>(205–271)           | 2.17 ± 0.30    | 8  | 3.52<br>(2.28–5.44)        | 0.82 ± 0.14    | 4  | 324<br>(201–522)           | 1.12 ± 0.24    | 4  |
|                     | 73.61<br>(20.65–245)       | 0.60 ± 0.30    | 11 | 255<br>(219–296)           | 2.22 ± 0.37    | 5  | 4.35<br>(2.21–8.55)        | 1.36 ± 0.47    | 4  | 36.65<br>(30.79–43.63)     | 2.07 ± 0.35    | 10 |
| ACh + rocuronium    | 759<br>(144–3,987)         | 0.83 ± 0.32    | 11 | 383<br>(274–534)           | 2.36 ± 0.87    | 8  | 1.96<br>(1.32–2.90)        | 1.34 ± 0.31    | 4  | 279<br>(191–409)           | 1.98 ± 0.75    | 4  |
|                     | 40.13<br>(7.28–221)        | 0.48 ± 0.31    | 11 | 1,537<br>(39.7–59,230)     | 0.95 ± 0.65    | 5  | 2.49<br>(1.11–5.58)        | 1.56 ± 0.78    | 4  | 66.15<br>(54.06–80.93)     | 1.76 ± 0.26    | 8  |
| Vecuronium          |                            |                |    |                            |                |    |                            |                |    |                            |                |    |
| ACh                 | 551<br>(65.94–4,597)       | 0.74 ± 0.36    | 8  | 291<br>(224–378)           | 2.03 ± 0.56    | 8  | 1.92<br>(1.28–2.88)        | 0.91 ± 0.16    | 4  | 347<br>(257–469)           | 1.39 ± 0.24    | 7  |
|                     | 53.72<br>(21.63–133)       | 0.67 ± 0.25    | 8  | 290<br>(239–352)           | 2.58 ± 0.90    | 8  | 2.92<br>(2.17–3.92)        | 0.91 ± 0.12    | 4  | 53.88<br>(41.57–69.83)     | 1.07 ± 0.14    | 5  |
| ACh + vecuronium    | 687<br>(67.85–6,955)       | 0.69 ± 0.30    | 8  | 1,915<br>(20.29–180,800)   | 1.17 ± 1.14    | 8  | 7.11<br>(4.15–12.17)       | 1.04 ± 0.28    | 4  | 290<br>(215–392)           | 1.82 ± 0.48    | 7  |
|                     | 16.43<br>(3.69–73.15)      | 0.63 ± 0.30    | 8  | 1,294<br>(17.29–96,780)    | 2.55 ± 11.44   | 8  | 8.00<br>(5.81–11.03)       | 1.04 ± 0.16    | 4  | 164<br>(144–186)           | 1.10 ± 0.07    | 5  |

Shaded areas = peak, white areas = net charge.

ACh = acetylcholine; CI = confidence interval; d-TC = d-tubocurarine; EC<sub>50</sub> = Half activation concentration; nAChR = nicotinic acetylcholine receptor; n<sub>H</sub> = Hill coefficient; NMBA = neuromuscular blocking agent.



## Appendix 2: Pharmacologic Properties of NMBAs as Inhibitors of Acetylcholine-induced Activation of Human Neuronal nAChRs Expressed in *Xenopus* Oocytes

|                                      | Atracurium                 |                  |   | Cisatracurium              |                  |    | d-Tubocurarine             |                  |    | Mivacurium                 |                  |   |
|--------------------------------------|----------------------------|------------------|---|----------------------------|------------------|----|----------------------------|------------------|----|----------------------------|------------------|---|
|                                      | IC <sub>50</sub> , $\mu$ M | n <sub>H</sub>   | n | IC <sub>50</sub> , $\mu$ M | n <sub>H</sub>   | n  | IC <sub>50</sub> , $\mu$ M | n <sub>H</sub>   | n  | IC <sub>50</sub> , $\mu$ M | n <sub>H</sub>   | n |
| $\alpha_1\beta_1\epsilon\delta$ (nM) |                            |                  |   |                            |                  |    |                            |                  |    |                            |                  |   |
| 10 $\mu$ M ACh                       | 95.65                      | $-1.01 \pm 0.12$ | 4 | 18.19                      | $-0.76 \pm 0.10$ | 4  | 18.73                      | $-0.78 \pm 0.08$ | 5  | 3.69                       | $-0.77 \pm 0.12$ | 4 |
|                                      | (73.89–123.80)             |                  |   | (12.64–26.16)              |                  |    | (13.87–25.30)              |                  |    | (2.22–6.15)                |                  |   |
|                                      | 67.36                      | $-0.82 \pm 0.11$ | 4 | 17.01                      | $-0.80 \pm 0.11$ | 4  | 15.85                      | $-0.84 \pm 0.12$ | 5  | 2.96                       | $-0.78 \pm 0.08$ | 4 |
|                                      | (47.36–95.80)              |                  |   | (11.95–24.21)              |                  |    | (10.92–23.01)              |                  |    | (2.11–4.17)                |                  |   |
| $\alpha_3\beta_2$                    |                            |                  |   |                            |                  |    |                            |                  |    |                            |                  |   |
| 50 $\mu$ M ACh                       | 4.99                       | $-0.72 \pm 0.12$ | 4 | 12.68                      | $-0.69 \pm 0.23$ | 6  | 4.78                       | $-1.29 \pm 0.46$ | 6  | 69.04                      | $-1.93 \pm 0.58$ | 8 |
|                                      | (3.08–8.09)                |                  |   | (5.16–31.16)               |                  |    | (2.93–7.81)                |                  |    | (46.41–103)                |                  |   |
|                                      | 20.42                      | $-0.96 \pm 0.25$ | 4 | 19.30                      | $-0.47 \pm 0.07$ | 6  | 4.01                       | $-1.09 \pm 0.12$ | 6  | 43.59                      | $-0.42 \pm 0.07$ | 8 |
|                                      | (11.55–36.12)              |                  |   | (11.31–32.96)              |                  |    | (3.34–4.81)                |                  |    | (22.00–86.34)              |                  |   |
| 300 $\mu$ M ACh                      | 9.24                       | $-0.52 \pm 0.14$ | 2 | 28.34                      | $-0.49 \pm 0.14$ | 5  | 2.55                       | $-0.80 \pm 0.21$ | 7  | Do not fit                 |                  | 9 |
|                                      | (3.72–22.97)               |                  |   | (10.23–78.45)              |                  |    | (1.42–4.55)                |                  |    |                            |                  |   |
|                                      | 9.61                       | $-0.65 \pm 0.08$ | 3 | 62.08                      | $-0.49 \pm 0.12$ | 3  | 1.44                       | $-0.58 \pm 0.05$ | 7  | 33.31                      | $-0.66 \pm 0.08$ | 9 |
|                                      | (6.81–13.55)               |                  |   | (24.89–154.9)              |                  |    | (1.10–1.88)                |                  |    | (23.36–47.51)              |                  |   |
| $\alpha_3\beta_4$                    |                            |                  |   |                            |                  |    |                            |                  |    |                            |                  |   |
| 50 $\mu$ M ACh                       | 11.65                      | $-0.61 \pm 0.09$ | 6 | 1.69                       | $-0.62 \pm 0.06$ | 10 | 19.78                      | $-0.89 \pm 0.15$ | 12 | 3.71                       | $-0.68 \pm 0.11$ | 4 |
|                                      | (7.63–17.79)               |                  |   | (1.21–2.36)                |                  |    | (13.18–29.70)              |                  |    | (2.56–5.39)                |                  |   |
|                                      | 4.75                       | $-0.65 \pm 0.10$ | 6 | 0.59                       | $-0.48 \pm 0.05$ | 10 | 14.30                      | $-1.07 \pm 0.20$ | 12 | 3.71                       | $-0.43 \pm 0.06$ | 4 |
|                                      | (3.12–7.23)                |                  |   | (0.36–1.00)                |                  |    | (9.61–21.26)               |                  |    | (2.56–5.39)                |                  |   |
| 300 $\mu$ M ACh                      | 0.94                       | $-0.73 \pm 0.09$ | 6 | 1.94                       | $-0.73 \pm 0.10$ | 8  | 2.14                       | $-0.59 \pm 0.09$ | 9  | 4.58                       | $-0.63 \pm 0.11$ | 5 |
|                                      | (0.64–1.38)                |                  |   | (1.27–2.98)                |                  |    | (1.27–3.62)                |                  |    | (2.73–6.69)                |                  |   |
|                                      | 0.32                       | $-0.63 \pm 0.09$ | 4 | 0.40                       | $-0.47 \pm 0.06$ | 8  | 0.76                       | $-0.74 \pm 0.14$ | 9  | 1.04                       | $-0.79 \pm 0.10$ | 5 |
|                                      | (0.18–0.57)                |                  |   | (0.22–0.71)                |                  |    | (0.42–1.38)                |                  |    | (0.74–1.46)                |                  |   |
| $\alpha_4\beta_2$                    |                            |                  |   |                            |                  |    |                            |                  |    |                            |                  |   |
| 1 $\mu$ M ACh                        | 7.89                       | $-0.96 \pm 0.10$ | 6 | 13.24                      | $-0.36 \pm 0.05$ | 7  | 1.77                       | $-0.68 \pm 0.04$ | 8  | 1.52                       | $-1.82 \pm 0.07$ | 3 |
|                                      | (6.38–9.76)                |                  |   | (7.61–23.06)               |                  |    | (1.47–2.14)                |                  |    | (1.10–2.10)                |                  |   |
|                                      | 5.43                       | $-0.87 \pm 0.22$ | 6 | 1.98                       | $-0.30 \pm 0.04$ | 7  | 8.20                       | $-0.66 \pm 0.05$ | 8  | 1.17                       | $-2.08 \pm 0.08$ | 3 |
|                                      | (3.30–8.95)                |                  |   | (0.96–4.10)                |                  |    | (6.44–10.40)               |                  |    | (0.77–1.76)                |                  |   |
| 10 $\mu$ M ACh                       | 21.07                      | $-0.67 \pm 0.07$ | 8 | 66.74                      | $-0.43 \pm 0.09$ | 7  | 5.06                       | $-0.81 \pm 0.05$ | 7  | Do not fit                 |                  | 4 |
|                                      | (15.84–28.02)              |                  |   | (28.38–156.9)              |                  |    | (4.31–5.94)                |                  |    |                            |                  |   |
|                                      | 10.44                      | $-0.51 \pm 0.06$ | 8 | 16.00                      | $-0.42 \pm 0.08$ | 7  | 3.29                       | $-0.79 \pm 0.07$ | 7  | Do not fit                 |                  | 4 |
|                                      | (7.15–15.24)               |                  |   | (7.84–32.65)               |                  |    | (2.60–48.17)               |                  |    |                            |                  |   |
| $\alpha_7$                           |                            |                  |   |                            |                  |    |                            |                  |    |                            |                  |   |
| 30 $\mu$ M ACh                       | 5.56                       | $-1.73 \pm 0.45$ | 4 | 6.19                       | $-1.27 \pm 0.11$ | 5  | 1.52                       | $-2.87 \pm 0.40$ | 4  | 2.90                       | $-1.61 \pm 0.33$ | 8 |
|                                      | (4.18–7.40)                |                  |   | (5.36–7.16)                |                  |    | (1.31–1.77)                |                  |    | (2.22–3.78)                |                  |   |
| 100 $\mu$ M ACh                      | 13.03                      | $-1.62 \pm 0.35$ | 5 | 14.62                      | $-1.34 \pm 0.42$ | 6  | 38.11                      | $-2.20 \pm 0.63$ | 5  | 9.92                       | $-1.67 \pm 0.26$ | 8 |
|                                      | (8.96–18.94)               |                  |   | (8.77–24.37)               |                  |    | (28.61–50.76)              |                  |    | (8.00–12.30)               |                  |   |

(continued)

## Appendix 2: Continued

|                                      | Pancuronium                |                  |   | Rocuronium                 |                  |   | Vecuronium                 |                  |    |
|--------------------------------------|----------------------------|------------------|---|----------------------------|------------------|---|----------------------------|------------------|----|
|                                      | IC <sub>50</sub> , $\mu$ M | n <sub>H</sub>   | n | IC <sub>50</sub> , $\mu$ M | n <sub>H</sub>   | n | IC <sub>50</sub> , $\mu$ M | n <sub>H</sub>   | n  |
| $\alpha_1\beta_1\epsilon\delta$ (nM) |                            |                  |   |                            |                  |   |                            |                  |    |
| 10 $\mu$ M ACh                       | 13.17<br>(7.88–22.02)      | –0.95 $\pm$ 0.22 | 7 | 13.76<br>(10.57–17.91)     | –0.70 $\pm$ 0.06 | 7 | 10.74<br>(5.48–21.06)      | –0.58 $\pm$ 0.11 | 6  |
|                                      | 7.11<br>(4.45–11.36)       | –0.78 $\pm$ 0.13 | 7 | 18.64<br>(12.06–28.81)     | –0.75 $\pm$ 0.12 | 5 | 8.02<br>(4.39–14.64)       | –0.76 $\pm$ 0.15 | 3  |
| $\alpha_3\beta_2$                    |                            |                  |   |                            |                  |   |                            |                  |    |
| 50 $\mu$ M ACh                       | 13.71<br>(6.92–27.17)      | –0.74 $\pm$ 0.20 | 8 | 8.30<br>(3.54–19.48)       | –0.78 $\pm$ 0.29 | 7 | 3.55<br>(2.32–5.43)        | –0.87 $\pm$ 0.17 | 7  |
|                                      | 7.84<br>(4.82–12.74)       | –0.43 $\pm$ 0.06 | 8 | 8.99<br>(6.38–12.66)       | –0.77 $\pm$ 0.08 | 7 | 3.32<br>(2.32–4.74)        | –0.59 $\pm$ 0.07 | 7  |
| 300 $\mu$ M ACh                      | 22.67<br>(7.51–68.44)      | –0.57 $\pm$ 0.21 | 8 | 14.63<br>(5.87–36.46)      | –0.91 $\pm$ 0.33 | 6 | 2.52<br>(0.97–6.57)        | –0.50 $\pm$ 0.14 | 7  |
|                                      | 13.88<br>(7.31–26.38)      | –0.39 $\pm$ 0.07 | 8 | 11.82<br>(8.74–15.97)      | –0.64 $\pm$ 0.07 | 6 | 1.29<br>(0.58–2.88)        | –0.42 $\pm$ 0.08 | 7  |
| $\alpha_3\beta_4$                    |                            |                  |   |                            |                  |   |                            |                  |    |
| 50 $\mu$ M ACh                       | 7.06<br>(5.07–9.83)        | –0.92 $\pm$ 0.15 | 3 | 4.12<br>(2.80–6.08)        | –0.49 $\pm$ 0.06 | 6 | 1.60<br>(1.35–1.91)        | –0.69 $\pm$ 0.04 | 5  |
|                                      | 9.60<br>(5.36–17.21)       | –0.90 $\pm$ 0.24 | 4 | 2.77<br>(1.83–4.19)        | –0.67 $\pm$ 0.10 | 6 | 0.97<br>(0.62–1.54)        | –0.59 $\pm$ 0.07 | 5  |
| 300 $\mu$ M ACh                      | 1.92<br>(0.94–3.93)        | –0.67 $\pm$ 0.16 | 6 | 0.46<br>(0.32–0.66)        | –0.86 $\pm$ 0.10 | 5 | 0.29<br>(0.15–0.56)        | –0.59 $\pm$ 0.09 | 11 |
|                                      | 0.53<br>(0.31–0.92)        | –0.84 $\pm$ 0.17 | 6 | 0.18<br>(0.13–0.25)        | –0.80 $\pm$ 0.07 | 5 | 0.13<br>(0.09–0.18)        | –1.12 $\pm$ 0.20 | 11 |
| $\alpha_4\beta_2$                    |                            |                  |   |                            |                  |   |                            |                  |    |
| 1 $\mu$ M ACh                        | 3.34<br>(3.06–3.65)        | –1.03 $\pm$ 0.05 | 6 | 1.11<br>(0.85–1.44)        | –0.83 $\pm$ 0.08 | 5 | 1.30<br>(0.88–1.90)        | –0.62 $\pm$ 0.07 | 8  |
|                                      | 2.64<br>(2.25–3.10)        | –1.09 $\pm$ 0.10 | 6 | 0.71<br>(0.47–1.06)        | –0.72 $\pm$ 0.10 | 5 | 0.33<br>(0.19–0.58)        | –0.49 $\pm$ 0.06 | 8  |
| 10 $\mu$ M ACh                       | 14.70<br>(12.52–17.26)     | –1.14 $\pm$ 0.08 | 6 | 5.37<br>(0.83–34.89)       | –0.61 $\pm$ 0.34 | 3 | 4.98<br>(3.65–6.79)        | –0.71 $\pm$ 0.08 | 3  |
|                                      | 13.29<br>(10.46–16.88)     | –1.33 $\pm$ 0.14 | 6 | 2.28<br>(0.42–12.47)       | –0.51 $\pm$ 0.23 | 3 | 2.65<br>(1.83–3.83)        | –0.86 $\pm$ 0.13 | 3  |
| $\alpha_7$                           |                            |                  |   |                            |                  |   |                            |                  |    |
| 30 $\mu$ M ACh                       | 13.33<br>(10.40–17.09)     | –1.91 $\pm$ 0.41 | 5 | 7.55<br>(6.24–9.14)        | –1.65 $\pm$ 0.22 | 8 | 7.70<br>(6.05–9.78)        | –1.16 $\pm$ 0.16 | 9  |
| 100 $\mu$ M ACh                      | 11.76<br>(9.70–14.26)      | –1.32 $\pm$ 0.16 | 8 | 5.06<br>(4.35–5.89)        | –2.18 $\pm$ 0.34 | 6 | 8.38<br>(7.29–9.63)        | –1.34 $\pm$ 0.12 | 8  |

Shaded areas shows pharmacologic data based on peak responses, whereas white areas shows net charge (area under the curve). Negative Hill coefficient (n<sub>H</sub>) is a result of inhibition.

ACh = acetylcholine; CI = confidence interval; IC<sub>50</sub> = half inhibition concentration; nAChR = nicotinic acetylcholine receptor; NMBA = neuromuscular blocking agent.
